# Supplementary material for: Directly embedded Ni3S2/Co9S8@S-doped carbon nanofiber networks as a free-standing anode for lithium-ion batteries
Source: Royal Society of Chemistry journal article supplement (doi:10.1039/d0se00320d), 2020-10-14
Supplement: d0se00320d1.pdf [file d0se00320d1.pdf]

## Directly Embedded Ni<sub>3</sub>S<sub>2</sub>/Co<sub>9</sub>S<sub>8</sub>@S-Doped Carbon Nanofiber Networks as Free-standing Anode for Lithium-ion Batteries

Zizhou He,<sup>a</sup> Hui Guo,<sup>a,h</sup> Jed D LaCoste,<sup>a</sup> Ryan A Cook,<sup>a</sup> Blake Hussey,<sup>a</sup> Xu Zhang,<sup>c</sup> Daniel Dianchen Gang,<sup>c</sup> Ji Hao,<sup>d</sup> Liang Chen,<sup>e</sup> Peter Cooke,<sup>f</sup> Hui Yan,<sup>b</sup> Ling Fei <sup>\*a</sup>

- 
- a. *Department of Chemical Engineering, Institute for Materials Research and Innovations, University of Louisiana at Lafayette, Lafayette, LA 70504, United States E-mail: ling.fei@louisiana.edu*
  - b. *Department of Chemistry, University of Louisiana at Lafayette, Lafayette, LA 70504, United States*
  - c. *Department of Civil Engineering, University of Louisiana at Lafayette, Lafayette, LA, 70504, United States*
  - d. *National Renewable Energy Laboratory, Materials Science Center, Golden, CO 80401, United States*
  - e. *New Jersey Institute to Technology, Newark, NJ 07102, United States*
  - f. *Core University Research Resources Laboratory, New Mexico State University, Las Cruces, NM 88003, United States*
  - g. *School of Chemical Engineering, Zhengzhou University, Zhengzhou 450001, P.R. China*

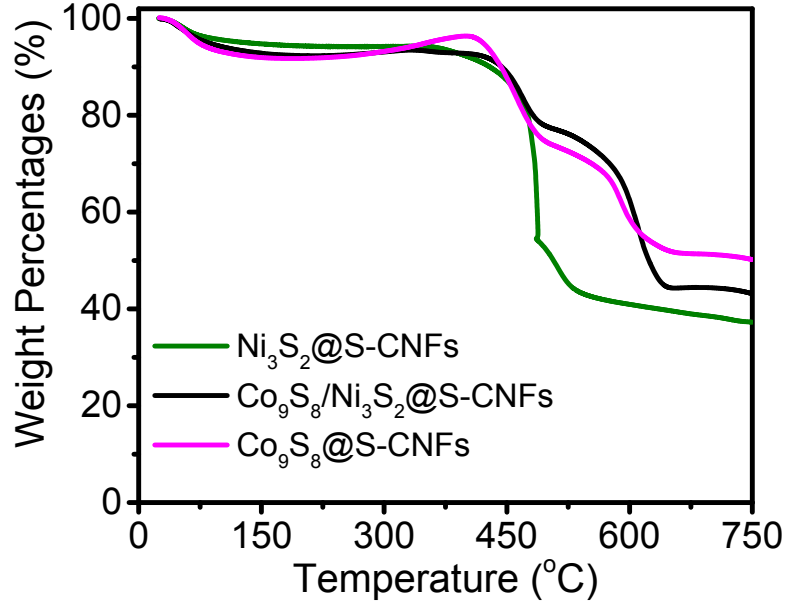

**Figure S1. TGA analysis of all the samples under air atmosphere**

To further confirm the composition of the as-prepared samples, we performed a TGA analysis under air atmosphere. The process involved combustion of carbon, oxidation-reduction reaction of metal sulfides:

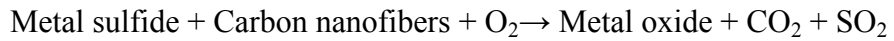

Where the metal sulfide composites were oxidized to NiO and Co<sub>3</sub>O<sub>4</sub>. Based on this formulation the weight percentages of Co<sub>9</sub>S<sub>8</sub>, Ni<sub>3</sub>S<sub>2</sub>/Co<sub>9</sub>S<sub>8</sub>, and Ni<sub>3</sub>S<sub>2</sub> in the composites are calculated to be 50.7%, 41.5%, and 39.5%, respectively

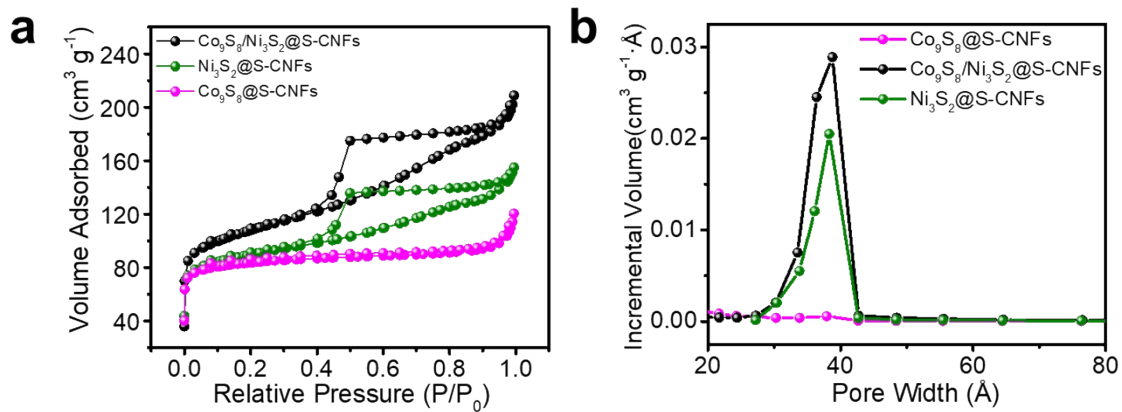

**Figure S2. (a) nitrogen  $\text{N}_2$  adsorption-desorption isotherms (b) pore-size distribution of the electrodes**

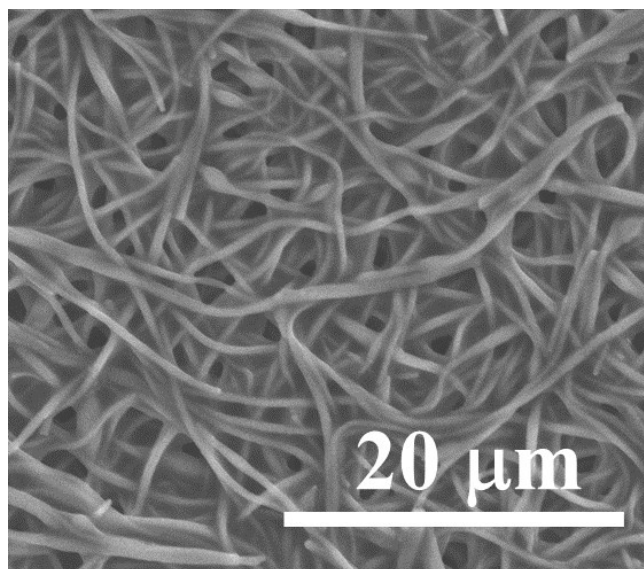

**Figure S3.** SEM image of  $\text{Ni}_3\text{S}_2/\text{Co}_9\text{S}_8@\text{S}$ -CNFs anode after 200 cycles at a current density of  $1 \text{ A g}^{-1}$

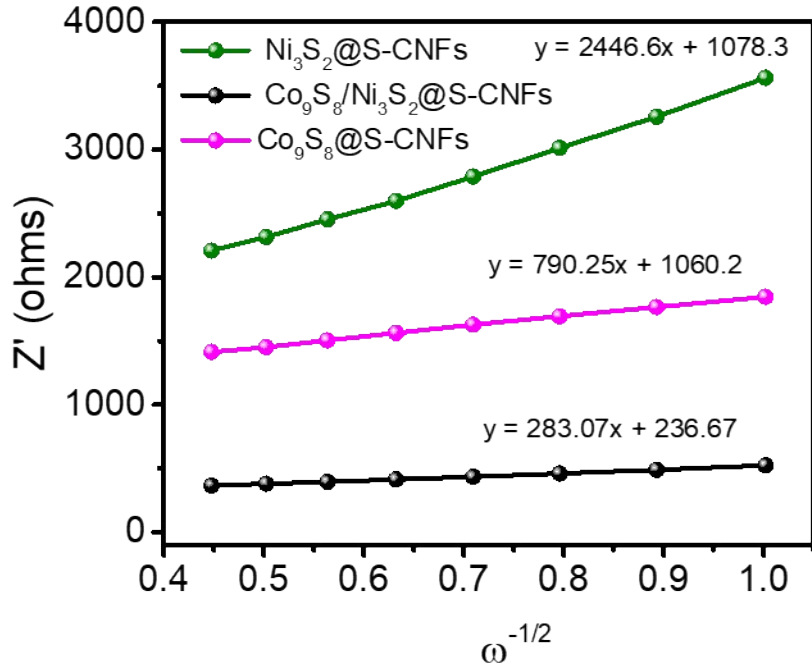

**Figure S4. The relationship plot of  $Z'$  versus  $\omega^{-1/2}$  at low-frequency region.**

The Li diffusion kinetics was analyzed via EIS by using the following equation:

$$D = \frac{R^2 T^2}{2A^2 n^2 F^4 C^2 \sigma^2} \quad \text{Equation S1}$$

Where R is the gas constant, T represents the temperature, A is the surface area of electrode, F is the Farady constant, n is the number of electrons per molecule attending the charge-discharge reaction, C is the concentration of lithium ion in the electrode, and  $\sigma$  is the slop of the line  $Z' - \omega^{-1/2}$ . Based on the equation, the lithium ions diffusion coefficient is inversely proportional to  $\sigma$  (shown in Figure S4).
